# Supplementary material for: Achievement of the Targets of the 20-Year Infancy-Onset Dietary Intervention—Association with Metabolic Profile from Childhood to Adulthood
Source: MDPI journal article supplement (doi:10.3390/nu13020533), 2021-02-06
Supplement: s1 [file s1]

Figure S1.

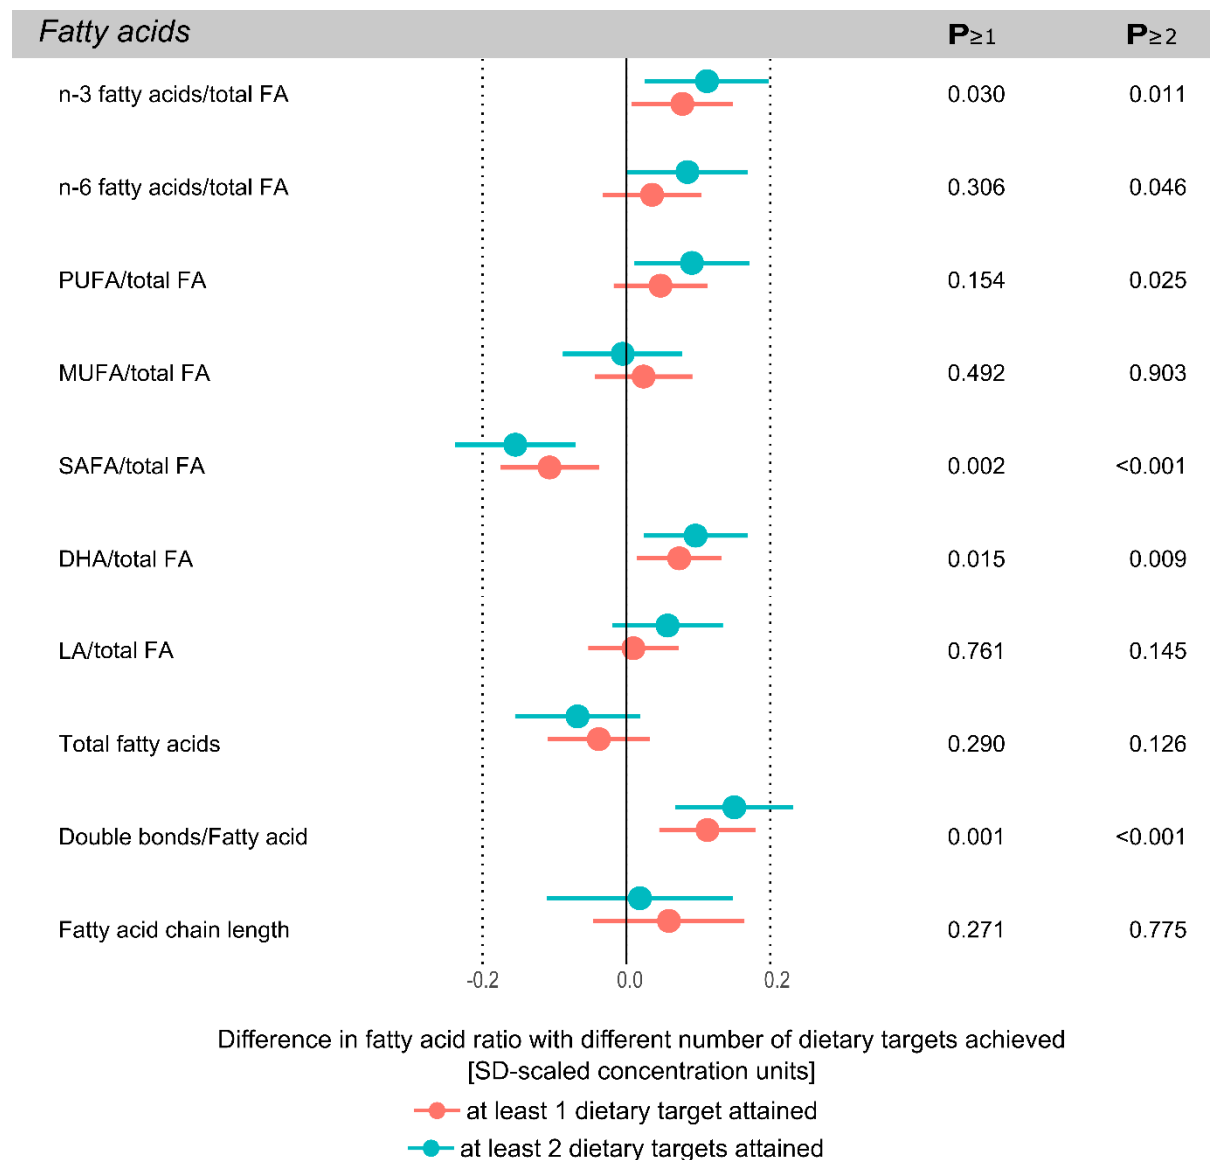

**Figure 4.** Differences in circulating serum fatty acids between achieving dietary targets compared to achieving none of the dietary targets when dietary target score includes a cholesterol target. Effect estimates are standard deviation scaled differences between achieving zero dietary targets with respect to achieving  $\geq 1$  (red) or  $\geq 2$  (blue) of the targets. Error bars indicate 95% confidence intervals. Metabolic measures are from pooled analyses across the 6 time-points. n-3 fatty acids/total FA denotes the ratio of omega-3 fatty acids to total fatty acids; PUFA, polyunsaturated fatty acids; MUFA, monounsaturated fatty acids; SAFA, saturated fatty acids; DHA, docosahexaenoic acid; LA, linoleic acid.

Figure S2.

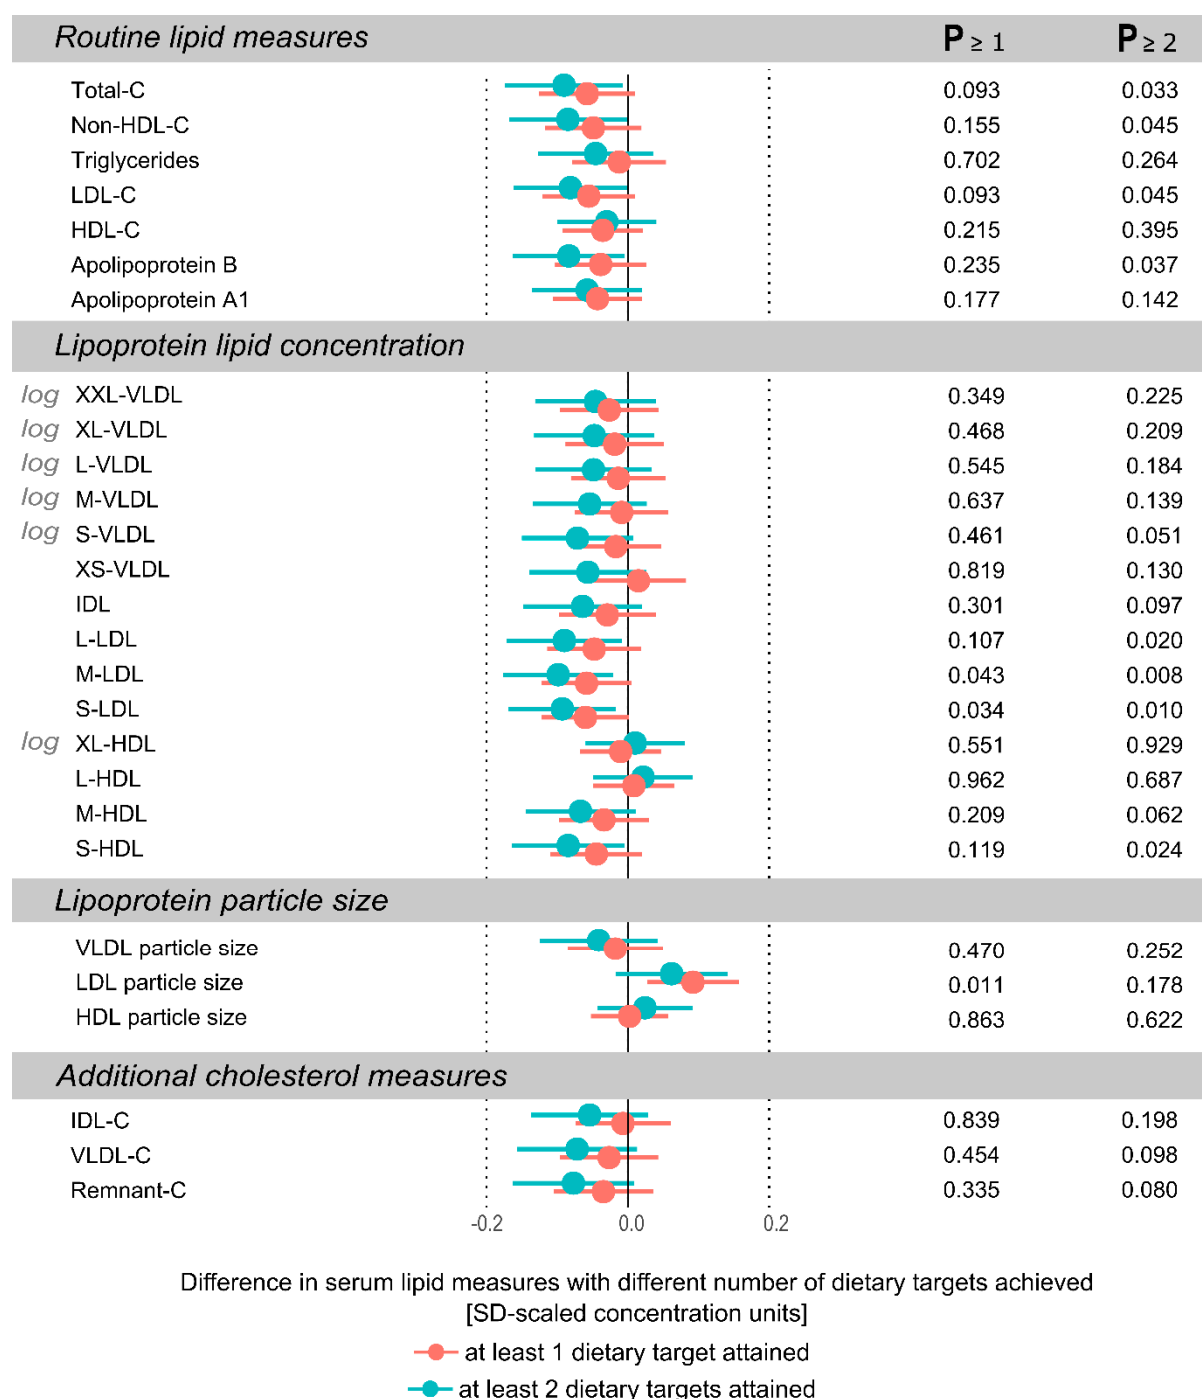

**Figure 5.** Differences in serum lipid measures between achieving dietary targets compared to achieving none of the dietary targets when dietary target score includes a cholesterol target. Effect estimates are standard deviation scaled differences between achieving zero dietary targets with respect to achieving  $\geq 1$  (red) or  $\geq 2$  (blue) of the targets. Error bars indicate 95% confidence intervals. Lipid measures are from pooled analysis across the 6 time-points and those with skewed distributions were  $\log(x+1)$ -transformed prior to analyses. C, cholesterol; HDL, high-density lipoprotein; LDL, low-density lipoprotein; VLDL, very-low-density lipoprotein; IDL, intermediate-density lipoprotein.

Figure S3.

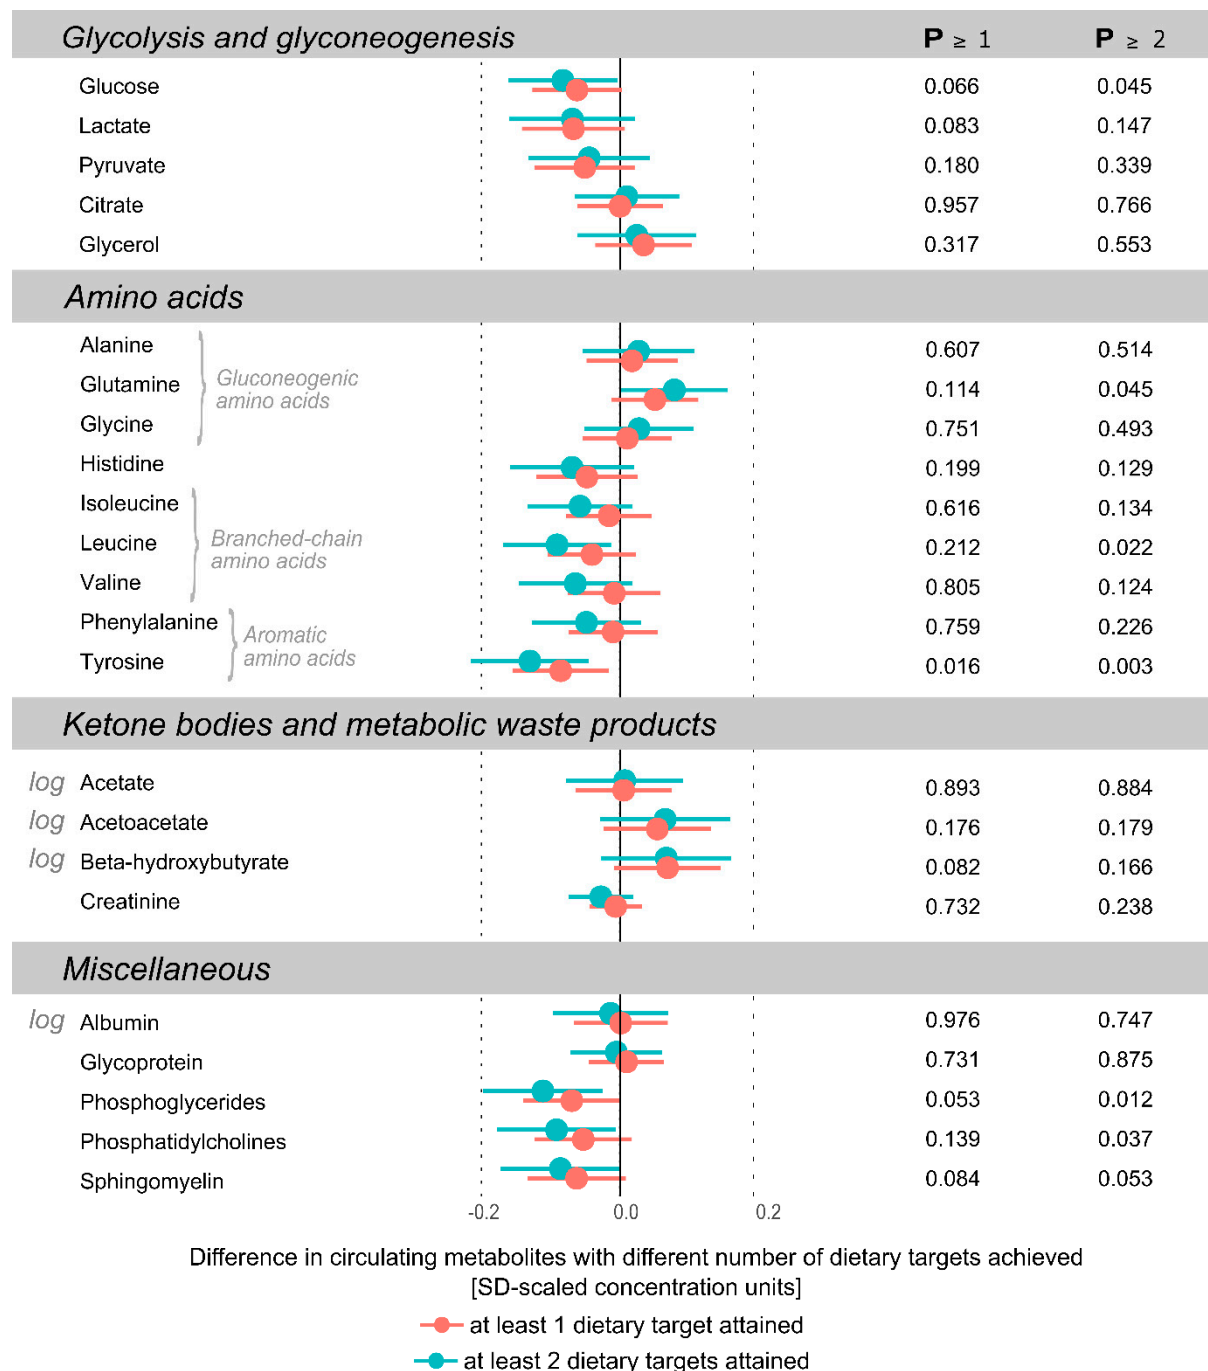

**Figure 6.** Differences in circulating metabolites between achieving dietary targets compared to achieving none of the dietary targets when dietary target score includes a cholesterol target. Effect estimates are standard deviation scaled differences between achieving zero dietary targets with respect to achieving  $\geq 1$  (red) or  $\geq 2$  (blue) of the targets. Error bars indicate 95% confidence intervals. Metabolic measures are from pooled analyses across the 6 time-points and those with skewed distributions were  $\log(x+1)$ -transformed prior to analyses.

Figure S4.

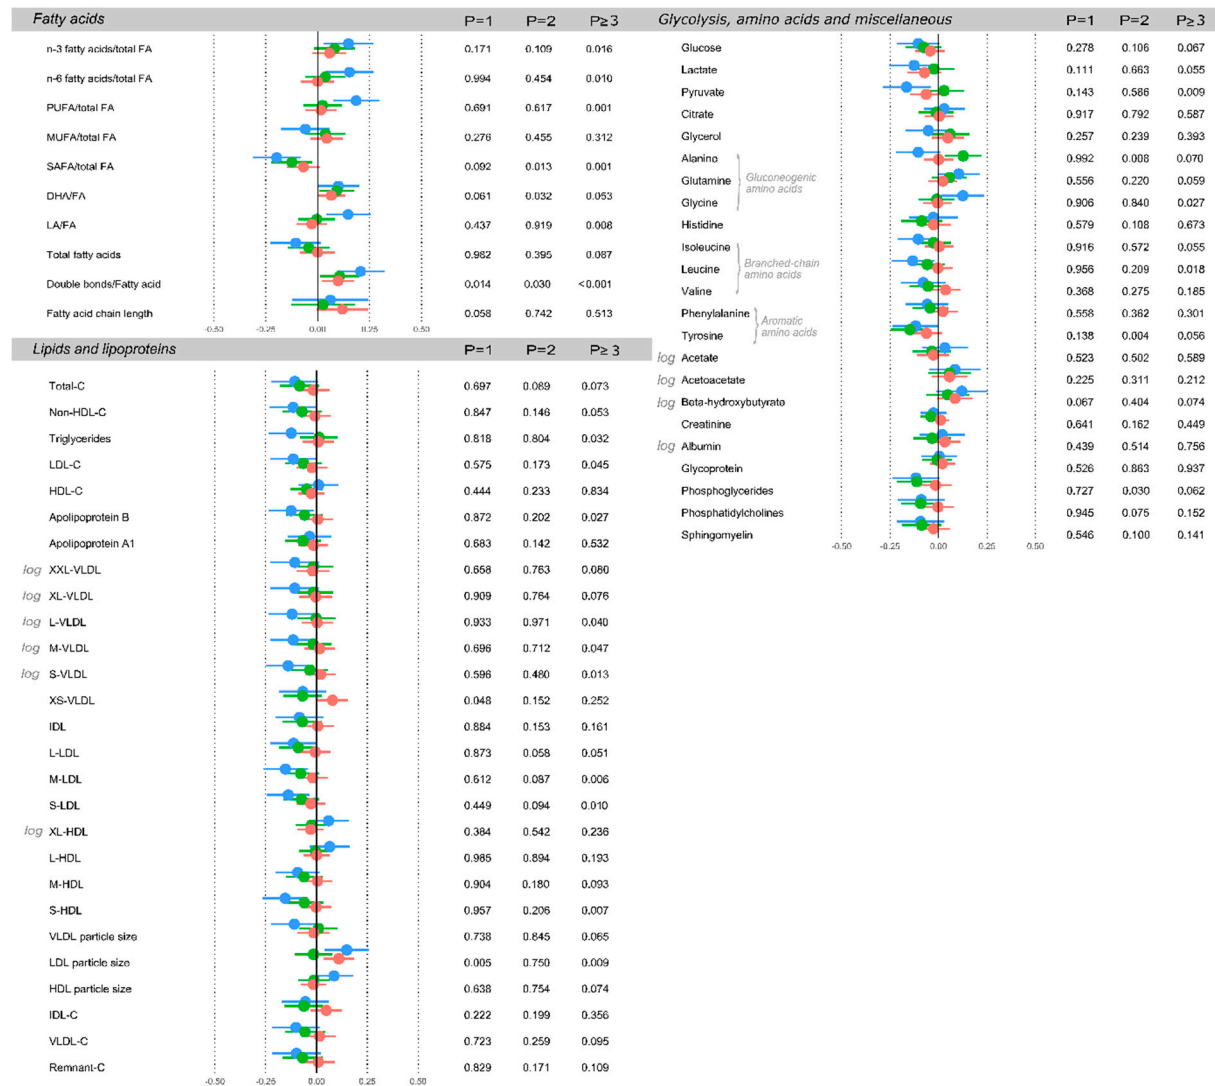

**Figure 7.** Differences in circulating metabolic measures between achieving dietary targets compared to achieving none of the dietary targets when dietary target score includes a cholesterol target. Effect estimates are standard deviation scaled differences between achieving zero dietary targets with respect to achieving one (red), two (green), or  $\geq 3$  (blue) of the targets. Error bars indicate 95% confidence intervals. Metabolic measures are from pooled analyses across the 6 time points and those with skewed distributions were  $\log(x+1)$ -transformed prior to analyses.

Table S1.

Table 1. Percentage (%) of participants meeting a specific dietary target and percentage (%) of participants achieving 0,  $\geq 1$ , and  $\geq 2$  dietary targets (in parenthesis; corresponding percentage of girls) from 9 to 19 years of age. For fiber and sucrose intake, the value of the corresponding dietary target percentile cut-point is also presented.

| <div>Age<br/>Dietary<br/>target</div>        | 9                         | 11                        | 13                        | 15                        | 17                        | 19                        |
|----------------------------------------------|---------------------------|---------------------------|---------------------------|---------------------------|---------------------------|---------------------------|
| S/(P+M) < 1:2                                | 10.0<br>(47)              | 12.4<br>(52)              | 11.8<br>(47)              | 15.0<br>(45)              | 17.6<br>(50)              | 19.8<br>(58)              |
| SAFA < 10 E%                                 | 20.5<br>(46)              | 19.5<br>(51)              | 18.4<br>(57)              | 25.8<br>(52)              | 21.5<br>(60)              | 21.3<br>(57)              |
| Fiber $\geq 80^{\text{th}}$ age-percentile   | 20.2<br>(58)<br>2.34 g/MJ | 19.5<br>(54)<br>2.28 g/MJ | 18.8<br>(57)<br>2.26 g/MJ | 19.7<br>(61)<br>2.46 g/MJ | 20.0<br>(72)<br>2.64 g/MJ | 18.9<br>(75)<br>2.65 g/MJ |
| Sucrose $\leq 20^{\text{th}}$ age-percentile | 19.9<br>(47)<br>6.7 [E%]  | 20.5<br>(42)<br>6.3 [E%]  | 20.0<br>(49)<br>6.4 [E%]  | 19.1<br>(33)<br>5.7 [E%]  | 20.0<br>(44)<br>5.2 [E%]  | 20.4<br>(42)<br>4.9 [E%]  |
| 0 targets achieved                           | 55.6<br>(51)              | 53.7<br>(46)              | 54.2<br>(47)              | 48.7<br>(46)              | 50.2<br>(46)              | 50.3<br>(52)              |
| $\geq 1$ target achieved                     | 44.4<br>(48)              | 46.3<br>(50)              | 45.8<br>(52)              | 51.3<br>(48)              | 49.8<br>(57)              | 49.7<br>(55)              |
| $\geq 2$ targets achieved                    | 18.6<br>(52)              | 18.9<br>(47)              | 16.9<br>(52)              | 21.2<br>(50)              | 22.2<br>(56)              | 21.6<br>(60)              |

S/SAFA = Saturated fat; P = polyunsaturated fat; M = monounsaturated fat; MJ = megajoule; E% = percentage of total energy intake

Table S2.

Table 2. Percentage (%) of intervention (I) and control (C) group children meeting a specific dietary target and achieving 0,  $\geq 1$ , and  $\geq 2$  dietary targets from 9 to 19 years of age.

| Age<br>Dietary<br>target                       | 9  |    | 11 |    | 13 |    | 15 |    | 17 |    | 19 |    |
|------------------------------------------------|----|----|----|----|----|----|----|----|----|----|----|----|
|                                                | I  | C  | I  | C  | I  | C  | I  | C  | I  | C  | I  | C  |
| S/(P+M) < 1:2                                  | 18 | 3  | 25 | 2  | 20 | 5  | 24 | 8  | 24 | 13 | 26 | 15 |
| SAFA < 10 E%                                   | 34 | 9  | 31 | 10 | 28 | 11 | 36 | 18 | 45 | 18 | 28 | 17 |
| Fiber $\geq$ 80 <sup>th</sup> age-percentile   | 28 | 14 | 26 | 14 | 30 | 13 | 23 | 17 | 20 | 20 | 20 | 18 |
| Sucrose $\leq$ 20 <sup>th</sup> age-percentile | 23 | 17 | 23 | 18 | 20 | 20 | 18 | 20 | 20 | 20 | 28 | 15 |
| 0 targets achieved                             | 42 | 67 | 40 | 65 | 44 | 63 | 39 | 56 | 47 | 53 | 42 | 56 |
| $\geq 1$ target achieved                       | 58 | 33 | 60 | 35 | 56 | 37 | 61 | 44 | 53 | 47 | 58 | 44 |
| $\geq 2$ targets achieved                      | 31 | 8  | 32 | 8  | 26 | 9  | 27 | 16 | 28 | 18 | 31 | 15 |

S/SAFA = Saturated fat; P = polyunsaturated fat; M = monounsaturated fat; MJ = megajoule; E% = percentage of total energy intake

Table S3.

Table 3. Percentage (%) of participants meeting the additional dietary cholesterol target and percentage (%) of participants achieving 0,  $\geq 1$ , and  $\geq 2$  dietary targets (in parenthesis; corresponding percentage of girls) from 9 to 19 years of age. The dietary cholesterol target percentile cut-point is also presented.

| Age<br>Dietary<br>target                           | 9                      | 11                     | 13                     | 15                     | 17                     | 19                     |
|----------------------------------------------------|------------------------|------------------------|------------------------|------------------------|------------------------|------------------------|
|                                                    |                        |                        |                        |                        |                        |                        |
| Cholesterol $\leq$ 20 <sup>th</sup> age-percentile | 20.0<br>(58)<br>132 mg | 19.9<br>(58)<br>137 mg | 20.0<br>(65)<br>145 mg | 19.7<br>(75)<br>141 mg | 20.5<br>(87)<br>133 mg | 19.8<br>(81)<br>130 mg |
| 0 targets achieved                                 | 50.3<br>(49)           | 46.1<br>(42)           | 47.8<br>(44)           | 43.4<br>(41)           | 42.4<br>(38)           | 44.4<br>(47)           |
| $\geq 1$ target achieved                           | 49.7<br>(50)           | 53.9<br>(53)           | 52.2<br>(54)           | 56.6<br>(51)           | 57.6<br>(61)           | 55.6<br>(59)           |
| $\geq 2$ targets achieved                          | 24.4 (50)              | 25.3 (48)              | 23.5 (56)              | 28.2 (56)              | 28.5 (62)              | 29.3 (66)              |

Table S4.

Table 4. The mean values for different dietary targets when zero, at least one or at least two dietary targets are achieved.

| Number of targets achieved<br>Mean of dietary target | 0    | $\geq 1$ | $\geq 2$ |
|------------------------------------------------------|------|----------|----------|
| SAFA/(MUFA+PUFA)                                     | 0.41 | 0.36     | 0.33     |
| SAFA [E%]                                            | 13.6 | 10.8     | 9.2      |
| Fiber [g/MJ]                                         | 1.7  | 2.3      | 2.5      |
| Sucrose [E%]                                         | 10.1 | 7.4      | 7.2      |

MJ = megajoule; E% = percentage of total energy intake

Table S5.

Table 5. Effect estimates for all metabolic measures analysed in absolute concentration units when compared to achieving zero dietary targets.

| Metabolite measure [unit]    | At least one dietary target attained, effect estimate [beta] | At least two dietary targets attained, effect estimate [beta] |
|------------------------------|--------------------------------------------------------------|---------------------------------------------------------------|
| $\omega$ -3 fatty acids [%]  | 0.08830                                                      | 0.15494                                                       |
| $\omega$ -6 fatty acids [%]  | 0.20012                                                      | 0.36180                                                       |
| PUFA [%]                     | 0.28491                                                      | 0.47043                                                       |
| MUFA [%]                     | -0.03896                                                     | -0.18101                                                      |
| SAFA [%]                     | -0.26955                                                     | -0.36488                                                      |
| Docosahexaenoic acid [%]     | 0.05134                                                      | 0.07639                                                       |
| Linoleic acid [%]            | 0.09541                                                      | 0.26496                                                       |
| Total fatty acids [mmol/l]   | -0.12002                                                     | -0.20510                                                      |
| Degree of unsaturation       | 0.01029                                                      | 0.01256                                                       |
| Fatty acid chain length      | 0.03607                                                      | 0.01693                                                       |
| Total cholesterol [mmol/l]   | -0.06367                                                     | -0.11110                                                      |
| Non-HDL cholesterol [mmol/l] | -0.05273                                                     | -0.09592                                                      |

|                                          |           |          |
|------------------------------------------|-----------|----------|
| Total triglycerides [mmol/l]             | -0.01457  | -0.03094 |
| LDL cholesterol [mmol/l]                 | -0.03269  | -0.05508 |
| HDL cholesterol [mmol/l]                 | -0.01022  | -0.01224 |
| Apolipoprotein B [g/l]                   | -0.01006  | -0.01977 |
| Apolipoprotein A-1 [g/l]                 | -0.01003  | -0.01627 |
| <i>log</i> Extremely large VLDL [mmol/l] | -0.00098  | -0.00144 |
| <i>log</i> Very large VLDL [mmol/l]      | -0.00235  | -0.00394 |
| <i>log</i> Large VLDL [mmol/l]           | -0.00554  | -0.00985 |
| <i>log</i> Medium VLDL [mmol/l]          | -0.00644  | -0.01176 |
| <i>log</i> Small VLDL [mmol/l]           | -0.00420  | -0.00938 |
| Very small VLDL [mmol/l]                 | -0.00108  | -0.00935 |
| IDL [mmol/l]                             | -0.01302  | -0.02732 |
| Large LDL [mmol/l]                       | -0.02239  | -0.04405 |
| Medium LDL [mmol/l]                      | -0.01573  | -0.02866 |
| Small LDL [mmol/l]                       | -0.00970  | -0.01667 |
| <i>log</i> Very large HDL [mmol/l]       | 0.00081   | 0.00446  |
| Large HDL [mmol/l]                       | 0.00355   | 0.00532  |
| Medium HDL [mmol/l]                      | -0.01067  | -0.01991 |
| Small HDL [mmol/l]                       | -0.01097  | -0.01816 |
| VLDL particle size (nm)                  | -0.07017  | -0.09244 |
| LDL particle size (nm)                   | 0.01933   | 0.01995  |
| HDL particle size (nm)                   | 0.00447   | 0.01028  |
| IDL cholesterol [mmol/l]                 | -0.00573  | -0.01815 |
| VLDL cholesterol [mmol/l]                | -0.00961  | -0.02028 |
| Remnant cholesterol [mmol/l]             | -0.01937  | -0.03994 |
| Glucose [mmol/l]                         | -0.02890  | -0.04054 |
| Lactate [mmol/l]                         | -0.03457  | -0.04019 |
| Pyruvate [mmol/l]                        | -0.00205  | -0.00260 |
| Citrate [mmol/l]                         | 0.00031   | 0.00025  |
| Glycerol [mmol/l]                        | 0.00013   | -0.00072 |
| Alanine [mmol/l]                         | -0.00055  | -0.00181 |
| Glutamine [mmol/l]                       | 0.00416   | 0.00523  |
| Glycine [mmol/l]                         | -3.18E-06 | 0.00058  |
| Histidine [mmol/l]                       | -0.00046  | -0.00047 |
| Isoleucine [mmol/l]                      | -0.00021  | -0.00073 |
| Leucine [mmol/l]                         | -0.00038  | -0.00095 |
| Valine [mmol/l]                          | -9.08E-06 | -0.00119 |
| Phenylalanine [mmol/l]                   | -0.00022  | -0.00043 |
| Tyrosine [mmol/l]                        | -0.00070  | -0.00120 |
| <i>log</i> Acetate [mmol/l]              | 1.39E-05  | 0.00022  |
| <i>log</i> Acetoacetate [mmol/l]         | 0.00317   | 0.00386  |
| <i>log</i> 3-hydroxybutyrate [mmol/l]    | 0.00421   | 0.00347  |
| Creatinine [mmol/l]                      | -0.00015  | -0.00037 |



|                                  |           |          |
|----------------------------------|-----------|----------|
| <i>log</i> Albumin [cu]          | -8.59E-05 | -0.00026 |
| Glycoprotein acetyls [mmol/l]    | -0.00411  | -0.00613 |
| Total phosphoglycerides [mmol/l] | -0.03157  | -0.05550 |
| Phosphatidylcholines [mmol/l]    | -0.02120  | -0.04159 |
| Sphingomyelins [mmol/l]          | -0.00725  | -0.00952 |

Abbreviations: PUFA, polyunsaturated fatty acids; MUFA, monounsaturated fatty acids; SAFA, saturated fatty acids; HDL, high-density lipoprotein; LDL, low-density lipoprotein; VLDL, very-low-density lipoprotein; IDL, intermediate-density lipoprotein.

Metabolic measures are from pooled analyses across the 6 time-points. 60 metabolic measures were quantified using a high-throughput serum NMR metabolomics platform (6). Quantification of lipoprotein subclasses was calibrated against high performance liquid chromatography on an external set of samples. The 14 lipoprotein subclass sizes were defined as follows: extremely large VLDL with particle diameters from 75 nm upwards and a possible contribution of chylomicrons, five VLDL subclasses (average particle diameters of 64.0 nm, 53.6 nm, 44.5 nm, 36.8 nm, and 31.3 nm), IDL (28.6 nm), three LDL subclasses (25.5 nm, 23.0 nm, and 18.7 nm), and four HDL subclasses (14.3 nm, 12.1 nm, 10.9 nm, and 8.7 nm). The mean size for VLDL, LDL and HDL particles was calculated by weighting the corresponding subclass diameters with their particle concentrations.
